# Supplementary material for: The possibility of care engineering to enhance STEAM education in future care through the title analysis
Source: Research Square preprint supplement (doi:10.21203/rs.3.rs-155854/v1), 2021-02-11
Supplement: Supplementary file 1 [file 85bdf18eefe163ff2150e432.pdf]

Table 2 Research fields and frequent words included in care technology or engineering

| 1921–1969                                                               |          |        | 1970–1979                                              |          |        | 1980–1989                                |          |        | 1990–1999                                |          |        | 2000–2009                                |          |            | 2010–2019                                |          |        |
|-------------------------------------------------------------------------|----------|--------|--------------------------------------------------------|----------|--------|------------------------------------------|----------|--------|------------------------------------------|----------|--------|------------------------------------------|----------|------------|------------------------------------------|----------|--------|
| 6 Articles                                                              |          |        | 51 Articles                                            |          |        | 75 Articles                              |          |        | 235 Articles                             |          |        | 367 Aarticles                            |          |            | 1084 Articles                            |          |        |
|                                                                         | <i>n</i> | (%)    |                                                        | <i>n</i> | (%)    |                                          | <i>n</i> | (%)    |                                          | <i>n</i> | (%)    |                                          | <i>n</i> | (%)        |                                          | <i>n</i> | (%)    |
| 1. Research Field (until top 6)                                         |          |        |                                                        |          |        |                                          |          |        |                                          |          |        |                                          |          |            |                                          |          |        |
| Medicine—General Internal                                               | 3        | (50.0) | Biomedical Engineering                                 | 10       | (19.6) | Biomedical Engineering                   | 13       | (17.3) | Healthcare Science Services              | 64       | (27.2) | Healthcare Science Services              | 104      | (28.3)     | Healthcare Science Services              | 207      | (19.1) |
| Engineering Aerospace                                                   | 1        | (16.7) | Medicine—General Internal                              | 9        | (17.6) | Medicine—General Internal                | 10       | (13.3) | Medical Informatics                      | 52       | (22.1) | Medical Informatics                      | 54       | (14.7)     | Nursing                                  | 150      | (13.8) |
| Psychiatry                                                              | 1        | (16.7) | Public Environmental Occupational Health               | 8        | (15.7) | Health Policy Services                   | 9        | (12.0) | Public Environmental Occupational Health | 32       | (13.6) | Health Policy Services                   | 51       | (13.9)     | Health Policy Services                   | 112      | (10.3) |
| Public Environmental Occupational Health                                | 1        | (16.7) | Health Policy Services                                 | 5        | (9.8)  | Public Environmental Occupational Health | 8        | (10.7) | Computer Science Information Systems     | 25       | (10.6) | Public Environmental Occupational Health | 50       | (13.6)     | Public Environmental Occupational Health | 111      | (10.2) |
|                                                                         |          |        | Economics                                              | 3        | (5.9)  | Healthcare Science Services              | 7        | (9.3)  | Health Policy Services                   | 24       | (10.2) | Computer Science Information Systems     | 40       | (10.9)     | Medical Informatics                      | 104      | (9.6)  |
|                                                                         |          |        | Multidisciplinary Sciences                             | 3        | (5.9)  | Medical Informatics                      | 7        | (9.3)  | Medicine—General Internal                | 24       | (10.2) | Nursing                                  | 34       | (9.3)      | Medicine—General Internal                | 67       | (6.2)  |
| 2. Frequent Words: Verbs, Adjectives, Nouns, and Adverbs (until top 10) |          |        |                                                        |          |        |                                          |          |        |                                          |          |        |                                          |          |            |                                          |          |        |
| child                                                                   | 2        | (33.3) | health                                                 | 37       | (72.5) | health                                   | 41       | (54.7) | health                                   | 145      | (61.7) | health                                   | 190      | (51.8)     | health                                   | 454      | (41.9) |
| health                                                                  | 2        | (33.3) | medical                                                | 9        | (17.6) | medical                                  | 14       | (18.7) | information                              | 41       | (17.4) | information                              | 91       | (24.8)     | information                              | 197      | (18.2) |
| medical                                                                 | 2        | (33.3) | cost                                                   | 6        | (11.8) | cost                                     | 9        | (12.0) | new                                      | 28       | (11.9) | use                                      | 46       | (12.5)     | use                                      | 112      | (10.3) |
|                                                                         |          |        | new                                                    | 5        | (9.8)  | system                                   | 7        | (9.3)  | cost/ home                               | 15       | (6.4)  | new                                      | 32       | (8.7)      | primary                                  | 100      | (9.2)  |
|                                                                         |          |        | need/ system                                           | 4        | (7.8)  | evaluation/ home                         | 6        | (8.0)  | medical                                  | 14       | (6.0)  | assessment                               | 30       | (8.2)      | study                                    | 96       | (8.9)  |
|                                                                         |          |        |                                                        |          |        | impact/ new/ use/ technology assessment  | 5        | (6.7)  | use                                      | 13       | (5.5)  | medical                                  | 27       | (7.4)      | patient                                  | 84       | (7.7)  |
|                                                                         |          |        |                                                        |          |        |                                          |          |        | care/ child                              | 12       | (5.1)  | system                                   | 25       | (6.8)      | use                                      | 78       | (7.2)  |
|                                                                         |          |        |                                                        |          |        |                                          |          |        | assessment                               | 11       | (4.7)  | improve                                  | 24       | (6.5)      | system                                   | 73       | (6.7)  |
|                                                                         |          |        |                                                        |          |        |                                          |          |        |                                          |          |        | patient                                  | 19       | (5.2)      | improve                                  | 72       | (6.6)  |
|                                                                         |          |        |                                                        |          |        |                                          |          |        |                                          |          |        | home/ quality                            | 18       | (4.9)      | communication                            | 60       | (5.5)  |
| Health, Medical                                                         |          |        | Cost                                                   |          |        | System                                   |          |        | Information                              |          |        | Assessment                               |          |            | primary                                  |          |        |
| 3. Prior or Two Previous Words before ‘Care’ (until top 10)             |          |        |                                                        |          |        |                                          |          |        |                                          |          |        |                                          |          |            |                                          |          |        |
| health                                                                  | 2        | (33.3) | health                                                 | 10       | (19.6) | health                                   | 42       | (56.0) | health                                   | 139      | (59.1) | health                                   | 142      | (38.7)     | health                                   | 245      | (22.6) |
| patient                                                                 | 1        | (16.7) | medical                                                | 3        | (5.9)  | medical                                  | 8        | (10.7) | home                                     | 12       | (5.1)  | intensive                                | 17       | (4.6)      | primary                                  | 99       | (9.1)  |
| medical                                                                 | 1        | (16.7) | animal/ community/ continuing/ engineering             | 1        | (2.0)  | home                                     | 5        | (6.7)  | critical                                 | 9        | (3.8)  | patient/ primary                         | 14       | (3.8)      | intensive                                | 50       | (4.6)  |
| child                                                                   | 1        | (16.7) | orthopaedic/ engineering                               |          |        | intensive                                | 3        | (4.0)  | intensive                                | 7        | (3.0)  | point of                                 | 13       | (3.5)      | point of                                 | 45       | (4.2)  |
|                                                                         |          |        | technical/ environmental/ home/ mental health/ special |          |        | health delivery/ patient/ mental health  | 2        | (2.7)  | eye/ manage                              | 6        | (2.6)  | manage                                   | 11       | (3.0)      | patient                                  | 34       | (3.1)  |
|                                                                         |          |        |                                                        |          |        |                                          |          |        | primary                                  | 5        | (2.1)  | critical/ home/ medical/ quality         | 9        | (2.5)      | home                                     | 31       | (2.9)  |
|                                                                         |          |        |                                                        |          |        |                                          |          |        | diabetes/ patient                        | 4        | (1.7)  |                                          |          | self       | 24                                       | (2.2)    |        |
|                                                                         |          |        |                                                        |          |        |                                          |          |        | skin                                     | 3        | (1.3)  |                                          |          | quality    | 23                                       | (2.1)    |        |
|                                                                         |          |        |                                                        |          |        |                                          |          |        |                                          |          |        |                                          |          | palliative | 22                                       | (2.0)    |        |
|                                                                         |          |        |                                                        |          |        |                                          |          |        |                                          |          |        |                                          |          | improve    | 19                                       | (1.8)    |        |
| Health, Medical                                                         |          |        | Home                                                   |          |        | Critical, Intensive                      |          |        | Patient, Primary                         |          |        | Self, Quality, Palliative                |          |            |                                          |          |        |
